# Supplementary material for: Genome-Wide Identification and Characterization of CLAVATA3/EMBRYO SURROUNDING REGION (CLE) Gene Family in Foxtail Millet (Setaria italica L.)
Source: MDPI journal article supplement (doi:10.3390/genes14112046), 2023-11-06
Supplement: s1 [file s1]

**Figure S1. Weblogo plots of the 5 conserved motifs of SiCLE peptides.**

**Figure S2. A comparative analysis of CLE core sequences among foxtail millet, Arabidopsis, rice, and maize.**

**Figure S3. Response of *SiCLE* genes to different plant hormones.** Different plant hormones are labeled in different colour.
