# Supplementary material for: Genome-Wide Identification and Characterization of CLAVATA3/EMBRYO SURROUNDING REGION (CLE) Gene Family in Foxtail Millet (Setaria italica L.)
Source: Genes (Basel). 2023 Nov 6;14(11):2046. doi: 10.3390/genes14112046 (PMC10671770; doi:10.3390/genes14112046)
Supplement: Supplementary file 1 [file genes-14-02046-s001.zip]

Archive with 8 entries (8 files):
- Figure S1. Weblogo plots of the 5 conserved motifs of SiCLE peptids..tif
- Figure S2. A comparative analysis of CLE core sequences among foxtail millet, Arabidopsis, rice, and maize..tif
- Figure S3. Response of SiCLE genes to different plant hormones.tif
- Supplementary Figure legends.pdf
- Table S1. Primers used to amplify the SiCLE genes and reference gene for qPCR..xlsx
- Table S2. CLE genes used for phylogenetic tree in Arabidopsis, rice and maize..xlsx
- Table S3. Major cis-regulatory elements in SiCLE gene promoters..xlsx
- Table S4. The Transcripts Per Million (TPM) values of the SiCLE genes in different tissues..xlsx
