# Supplementary material for: Genome-Wide Identification and Characterization of CLAVATA3/EMBRYO SURROUNDING REGION (CLE) Gene Family in Foxtail Millet (Setaria italica L.)
Source: Genes (Basel). 2023 Nov 6;14(11):2046. doi: 10.3390/genes14112046 (PMC10671770; doi:10.3390/genes14112046)
Supplement: Supplementary file 1 [file genes-14-02046-s001.zip › Table S1. Primers used to amplify the SiCLE genes and reference gene for qPCR..xlsx]

## Sheet: Sheet1
Table S1. Primers used to amplify the SiCLE genes and reference gene for qPCR.
Gene name	Forward primer	Reverse primer
	(5'→3')	(5'→3')
SiCLE1	TGTGTCTCTGCATCTGCATC	CTAGTGATGCTGAGGGTTGG
SiCLE3	ATGAGACAACCTACCACCGC	CAAGCAGCATCTTCCTTGCC
SiCLE6	TGGAGTACAAGACGACCCAG	ACCTATTGGAGTCCGGGTTG
SiCLE7	GATGCTCTTCCGGCAATCTC	GGAGAGGGTTTGGACCTTGA
SiCLE17	ATGAGACGACCTAGCGCC	CTGTTCGCCTCACCAGGAA
SiCLE20	GTCCTGTGCTTGTGCATCTG	CAGTGATGCTGCGGGTTC
SiCLE24	GAGAAGAGCAGGAACAAGCG	TAATTGGAGTCCGGGTTGGC
SiCLE31	CTTGACGCTTCCAAGGAG	CAGCACTTGTTGTGTATGGG
SiCLE33	CGGTTCTTCCTGTGCTTGG	CAAGGTGTGATCGGCTGC
SiCLE38	GAAGCAGTTCGTGGCTCC	CAGCTCCGGTTGTGTATGG
SiCLE41	ACCAGAGAGCTTCAGGTTCA	CAGTTGTGCAGCGGGTTG
Si9g37480 (reference)	ATGGCCCGTACCAAGCAAACT	GGATCTCACGGAGGGCAACAGT
