# Supplementary material for: Genome-Wide Identification and Characterization of CLAVATA3/EMBRYO SURROUNDING REGION (CLE) Gene Family in Foxtail Millet (Setaria italica L.)
Source: Genes (Basel). 2023 Nov 6;14(11):2046. doi: 10.3390/genes14112046 (PMC10671770; doi:10.3390/genes14112046)
Supplement: Supplementary file 1 [file genes-14-02046-s001.zip › Table S2. CLE genes used for phylogenetic tree in Arabidopsis, rice and maize..xlsx]

## Sheet: Sheet1
Table S2. CLE genes used for phylogenetic tree in Arabidopsis, rice and maize.
species	Gene name	Gene ID
Arabidopsis	AtCLE1	AT1G73165
Arabidopsis	AtCLE2	AT4G18510
Arabidopsis	AtCLE3	AT1G06225
Arabidopsis	AtCLE4	AT2G31081
Arabidopsis	AtCLE5	AT2G31083
Arabidopsis	AtCLE6	AT2G31085
Arabidopsis	AtCLE7	AT2G31082
Arabidopsis	AtCLE8	AT1G67775
Arabidopsis	AtCLE9	AT1G26600
Arabidopsis	AtCLE10	AT1G69320
Arabidopsis	AtCLE12	AT1G68795
Arabidopsis	AtCLE13	AT1G73965
Arabidopsis	AtCLE14	AT1G63245
Arabidopsis	AtCLE16	AT2G01505
Arabidopsis	AtCLE17	AT1G70895
Arabidopsis	AtCLE18	AT1G66145
Arabidopsis	AtCLE19	AT3G24225
Arabidopsis	AtCLE20	AT1G05065
Arabidopsis	AtCLE21	AT5G64800
Arabidopsis	AtCLE22	AT5G12235
Arabidopsis	AtCLE25	AT3G28455
Arabidopsis	AtCLE26	AT1G69970
Arabidopsis	AtCLE12	AT1G68795
Arabidopsis	AtCLE13	AT1G73965
Arabidopsis	AtCLE14	AT1G63245
Arabidopsis	AtCLE16	AT2G01505
Arabidopsis	AtCLE17	AT1G70895
Arabidopsis	AtCLE18	AT1G66145
Arabidopsis	AtCLE19	AT3G24225
Arabidopsis	AtCLE20	AT1G05065
Arabidopsis	AtCLE21	AT5G64800
Arabidopsis	AtCLE22	AT5G12235
Arabidopsis	AtCLE26	AT1G69970
Arabidopsis	AtCLE40	AT5G12990
Arabidopsis	AtCLE41	AT3G24770
Arabidopsis	AtCLE42	AT2G34925
Arabidopsis	AtCLE43	AT1G25425
Arabidopsis	AtCLE44	AT4G13195
Arabidopsis	AtCLE45	AT1G69588
Arabidopsis	AtCLE46	AT5G59305
Arabidopsis	AtCLV3	AT2G27250
rice	OsCLE101	Os01g0170900
rice	OsCLE102	Os01g0339400
rice	OsCLE103	Os01g0509400
rice	OsCLE205	Os02g0809300
rice	OsCLE206	Os02g0826300
rice	OsCLE301	Os03g0111000
rice	OsCLE302	Os03g0260432
rice	OsCLE303	Os03g0366100
rice	OsCLE305	Os03g0692100
rice	OsCLE306	Os03g0803200
rice	OsCLE404	Os04g0658800
rice	OsCLE48	Os05g0561300
rice	OsCLE501	Os05g0117000
rice	OsCLE502	Os05g0117300
rice	OsCLE503	Os05g0170600
rice	OsCLE507	Os05g0505900
rice	OsCLE508	Os05g0512301
rice	OsCLE603	Os06g0697300
rice	OsFCP1	Os04g0473800
rice	OsFCP2	Os06g0532500
rice	OsFON2/OsFON4	Os11g0595400
rice	OsFOS1	Os02g0324400
maize	ZmCLE10A	Zm00001eb338500
maize	ZmCLE10B	Zm00001eb119950
maize	ZmCLE13	Zm00001eb271070
maize	ZmCLE14	Zm00001d007576
maize	ZmCLE15	Zm00001d038997
maize	ZmCLE16	Zm00001d047879
maize	ZmCLE18	Zm00001eb232380
maize	ZmCLE19A	Zm00001eb067630
maize	ZmCLE19B	Zm00001eb432560
maize	ZmCLE2	Zm00001d046137
maize	ZmCLE20	Zm00001d022023
maize	ZmCLE21	Zm00001eb044230
maize	ZmCLE22	Zm00001eb292650
maize	ZmCLE23	Zm00001eb226510
maize	ZmCLE24	Zm00001d051859
maize	ZmCLE26	Zm00001eb336700
maize	ZmCLE27	Zm00001d025918
maize	ZmCLE29	Zm00001eb273180
maize	ZmCLE30	Zm00001eb018420
maize	ZmCLE4B	Zm00001eb212680
maize	ZmCLE4C	Zm00001eb302690
maize	ZmCLE5	Zm00001eb217100
maize	ZmCLE6	Zm00001eb152890
maize	ZmCLE7	GRMZM2G372364
maize	ZmCLE8	Zm00001eb343600
maize	ZmESR3	Zm00001d027821
maize	ZmFCP1	Zm00001eb079890
