# Supplementary material for: Genome-Wide Identification and Characterization of CLAVATA3/EMBRYO SURROUNDING REGION (CLE) Gene Family in Foxtail Millet (Setaria italica L.)
Source: Genes (Basel). 2023 Nov 6;14(11):2046. doi: 10.3390/genes14112046 (PMC10671770; doi:10.3390/genes14112046)
Supplement: Supplementary file 1 [file genes-14-02046-s001.zip › Table S3. Major cis-regulatory elements in SiCLE gene promoters..xlsx]

## Sheet: Sheet1
Table S3. Major cis-regulatory elements in SiCLE gene promoters.
gene name	gene ID	start	end	cis-regulatory elements
SiCLE1	Si1g02740	274	314	cis-acting element involved in salicylic acid responsiveness
SiCLE1	Si1g02740	1278	1318	cis-acting element involved in salicylic acid responsiveness
SiCLE1	Si1g02740	1930	1970	cis-acting element involved in salicylic acid responsiveness
SiCLE1	Si1g02740	-9	31	cis-acting regulatory element involved in the MeJA-responsiveness
SiCLE1	Si1g02740	882	922	cis-acting regulatory element involved in the MeJA-responsiveness
SiCLE1	Si1g02740	1055	1095	cis-acting regulatory element involved in the MeJA-responsiveness
SiCLE1	Si1g02740	1807	1847	cis-acting regulatory element involved in the MeJA-responsiveness
SiCLE1	Si1g02740	1833	1873	cis-acting regulatory element involved in the MeJA-responsiveness
SiCLE1	Si1g02740	1260	1300	cis-acting element involved in low-temperature responsiveness
SiCLE1	Si1g02740	1759	1799	cis-acting element involved in low-temperature responsiveness
SiCLE1	Si1g02740	1407	1447	cis-acting element involved in gibberellin-responsiveness
SiCLE1	Si1g02740	1332	1372	cis-acting element involved in gibberellin-responsiveness
SiCLE1	Si1g02740	250	290	cis-acting element involved in the abscisic acid responsiveness
SiCLE1	Si1g02740	1053	1093	cis-acting element involved in the abscisic acid responsiveness
SiCLE2	Si1g09260	806	846	cis-acting regulatory element related to meristem expression
SiCLE2	Si1g09260	1811	1851	cis-acting regulatory element related to meristem expression
SiCLE2	Si1g09260	1817	1857	cis-acting regulatory element related to meristem expression
SiCLE2	Si1g09260	1823	1863	cis-acting regulatory element related to meristem expression
SiCLE2	Si1g09260	215	255	cis-acting regulatory element involved in the MeJA-responsiveness
SiCLE2	Si1g09260	673	713	cis-acting regulatory element involved in the MeJA-responsiveness
SiCLE2	Si1g09260	819	859	cis-acting regulatory element involved in the MeJA-responsiveness
SiCLE2	Si1g09260	1488	1528	cis-acting regulatory element involved in the MeJA-responsiveness
SiCLE2	Si1g09260	331	371	cis-acting element involved in auxin responsiveness
SiCLE2	Si1g09260	401	441	cis-acting element involved in auxin responsiveness
SiCLE2	Si1g09260	770	810	cis-acting element involved in the abscisic acid responsiveness
SiCLE2	Si1g09260	813	853	cis-acting element involved in the abscisic acid responsiveness
SiCLE2	Si1g09260	816	856	cis-acting element involved in the abscisic acid responsiveness
SiCLE2	Si1g09260	854	894	cis-acting element involved in gibberellin-responsiveness
SiCLE3	Si1g15040	1134	1174	cis-acting element involved in the abscisic acid responsiveness
SiCLE3	Si1g15040	1135	1175	cis-acting element involved in the abscisic acid responsiveness
SiCLE3	Si1g15040	1147	1187	cis-acting element involved in the abscisic acid responsiveness
SiCLE3	Si1g15040	1148	1188	cis-acting element involved in the abscisic acid responsiveness
SiCLE3	Si1g15040	1713	1753	cis-acting element involved in the abscisic acid responsiveness
SiCLE3	Si1g15040	1824	1864	cis-acting element involved in the abscisic acid responsiveness
SiCLE3	Si1g15040	1826	1866	cis-acting element involved in the abscisic acid responsiveness
SiCLE3	Si1g15040	1828	1868	cis-acting element involved in the abscisic acid responsiveness
SiCLE3	Si1g15040	1831	1871	cis-acting element involved in the abscisic acid responsiveness
SiCLE3	Si1g15040	939	979	cis-acting element involved in gibberellin-responsiveness
SiCLE3	Si1g15040	1233	1273	cis-acting element involved in gibberellin-responsiveness
SiCLE3	Si1g15040	628	668	cis-acting regulatory element involved in the MeJA-responsiveness
SiCLE3	Si1g15040	631	671	cis-acting regulatory element involved in the MeJA-responsiveness
SiCLE3	Si1g15040	412	452	cis-acting element involved in gibberellin-responsiveness
SiCLE3	Si1g15040	645	685	cis-acting element involved in salicylic acid responsiveness
SiCLE4	Si1g21450	1746	1786	cis-acting regulatory element related to meristem expression
SiCLE4	Si1g21450	39	79	cis-acting element involved in salicylic acid responsiveness
SiCLE4	Si1g21450	686	726	cis-acting element involved in auxin responsiveness
SiCLE4	Si1g21450	1576	1616	cis-acting element involved in auxin responsiveness
SiCLE4	Si1g21450	935	975	cis-acting regulatory element involved in the MeJA-responsiveness
SiCLE4	Si1g21450	966	1006	cis-acting regulatory element involved in the MeJA-responsiveness
SiCLE4	Si1g21450	841	881	cis-acting element involved in gibberellin-responsiveness
SiCLE4	Si1g21450	1648	1688	cis-acting element involved in gibberellin-responsiveness
SiCLE4	Si1g21450	1144	1184	cis-acting element involved in the abscisic acid responsiveness
SiCLE5	Si1g25600	105	145	cis-acting regulatory element related to meristem expression
SiCLE5	Si1g25600	130	170	cis-acting regulatory element related to meristem expression
SiCLE5	Si1g25600	337	377	cis-acting element involved in low-temperature responsiveness
SiCLE5	Si1g25600	961	1001	cis-acting element involved in the abscisic acid responsiveness
SiCLE6	Si1g36220	866	906	cis-acting element involved in auxin responsiveness
SiCLE6	Si1g36220	405	445	cis-acting regulatory element involved in the MeJA-responsiveness
SiCLE6	Si1g36220	1229	1269	cis-acting regulatory element involved in the MeJA-responsiveness
SiCLE6	Si1g36220	1241	1281	cis-acting regulatory element involved in the MeJA-responsiveness
SiCLE6	Si1g36220	1761	1801	cis-acting regulatory element involved in the MeJA-responsiveness
SiCLE6	Si1g36220	203	243	cis-acting element involved in the abscisic acid responsiveness
SiCLE6	Si1g36220	761	801	cis-acting element involved in the abscisic acid responsiveness
SiCLE6	Si1g36220	1023	1063	cis-acting element involved in the abscisic acid responsiveness
SiCLE6	Si1g36220	-18	22	cis-acting element involved in salicylic acid responsiveness
SiCLE6	Si1g36220	342	382	cis-acting element involved in salicylic acid responsiveness
SiCLE6	Si1g36220	1343	1383	cis-acting element involved in low-temperature responsiveness
SiCLE6	Si1g36220	1387	1427	cis-acting element involved in low-temperature responsiveness
SiCLE7	Si1g37440	847	887	cis-acting regulatory element involved in the MeJA-responsiveness
SiCLE7	Si1g37440	1114	1154	cis-acting regulatory element involved in the MeJA-responsiveness
SiCLE7	Si1g37440	1539	1579	cis-acting element involved in salicylic acid responsiveness
SiCLE7	Si1g37440	845	885	cis-acting element involved in the abscisic acid responsiveness
SiCLE8	Si2g07840	423	463	cis-acting regulatory element involved in the MeJA-responsiveness
SiCLE8	Si2g07840	448	488	cis-acting element involved in the abscisic acid responsiveness
SiCLE8	Si2g07840	643	683	cis-acting element involved in the abscisic acid responsiveness
SiCLE8	Si2g07840	1167	1207	cis-acting element involved in gibberellin-responsiveness
SiCLE8	Si2g07840	1226	1266	cis-acting element involved in gibberellin-responsiveness
SiCLE8	Si2g07840	1005	1045	cis-acting regulatory element related to meristem expression
SiCLE8	Si2g07840	1381	1421	cis-acting regulatory element related to meristem expression
SiCLE8	Si2g07840	1941	1981	cis-acting regulatory element related to meristem expression
SiCLE8	Si2g07840	869	909	cis-acting element involved in salicylic acid responsiveness
SiCLE8	Si2g07840	1591	1631	cis-acting element involved in auxin responsiveness
SiCLE9	Si2g37520	971	1011	cis-acting element involved in the abscisic acid responsiveness
SiCLE9	Si2g37520	972	1012	cis-acting element involved in the abscisic acid responsiveness
SiCLE9	Si2g37520	1284	1324	cis-acting element involved in the abscisic acid responsiveness
SiCLE9	Si2g37520	1688	1728	cis-acting element involved in gibberellin-responsiveness
SiCLE9	Si2g37520	1822	1862	cis-acting element involved in gibberellin-responsiveness
SiCLE9	Si2g37520	1123	1163	cis-acting element involved in defense and stress responsiveness
SiCLE9	Si2g37520	1761	1801	cis-acting element involved in defense and stress responsiveness
SiCLE9	Si2g37520	1568	1608	cis-acting element involved in auxin responsiveness
SiCLE9	Si2g37520	221	261	cis-acting element involved in gibberellin-responsiveness
SiCLE9	Si2g37520	78	118	cis-acting element involved in salicylic acid responsiveness
SiCLE9	Si2g37520	402	442	cis-acting regulatory element related to meristem expression
SiCLE9	Si2g37520	479	519	cis-acting regulatory element related to meristem expression
SiCLE10	Si3g03240	166	206	cis-acting regulatory element related to meristem expression
SiCLE10	Si3g03240	1367	1407	cis-acting regulatory element related to meristem expression
SiCLE10	Si3g03240	1499	1539	cis-acting regulatory element related to meristem expression
SiCLE10	Si3g03240	514	554	cis-acting regulatory element involved in the MeJA-responsiveness
SiCLE10	Si3g03240	636	676	cis-acting regulatory element involved in the MeJA-responsiveness
SiCLE10	Si3g03240	644	684	cis-acting regulatory element involved in the MeJA-responsiveness
SiCLE10	Si3g03240	1876	1916	cis-acting regulatory element involved in the MeJA-responsiveness
SiCLE10	Si3g03240	308	348	cis-acting element involved in the abscisic acid responsiveness
SiCLE10	Si3g03240	554	594	cis-acting element involved in the abscisic acid responsiveness
SiCLE10	Si3g03240	858	898	cis-acting element involved in the abscisic acid responsiveness
SiCLE10	Si3g03240	1046	1086	cis-acting element involved in the abscisic acid responsiveness
SiCLE10	Si3g03240	1210	1250	cis-acting element involved in the abscisic acid responsiveness
SiCLE10	Si3g03240	1874	1914	cis-acting element involved in the abscisic acid responsiveness
SiCLE11	Si3g10460	1511	1551	cis-acting element involved in the abscisic acid responsiveness
SiCLE11	Si3g10460	1584	1624	cis-acting element involved in the abscisic acid responsiveness
SiCLE11	Si3g10460	1477	1517	cis-acting element involved in gibberellin-responsiveness
SiCLE11	Si3g10460	1760	1800	cis-acting regulatory element involved in the MeJA-responsiveness
SiCLE11	Si3g10460	681	721	cis-acting element involved in auxin responsiveness
SiCLE12	Si3g14760	194	234	cis-acting regulatory element involved in the MeJA-responsiveness
SiCLE12	Si3g14760	299	339	cis-acting regulatory element involved in the MeJA-responsiveness
SiCLE12	Si3g14760	1002	1042	cis-acting regulatory element involved in the MeJA-responsiveness
SiCLE12	Si3g14760	1370	1410	cis-acting regulatory element involved in the MeJA-responsiveness
SiCLE12	Si3g14760	274	314	cis-acting element involved in the abscisic acid responsiveness
SiCLE12	Si3g14760	770	810	cis-acting element involved in the abscisic acid responsiveness
SiCLE12	Si3g14760	1000	1040	cis-acting element involved in the abscisic acid responsiveness
SiCLE12	Si3g14760	1450	1490	cis-acting element involved in the abscisic acid responsiveness
SiCLE12	Si3g14760	1491	1531	cis-acting element involved in the abscisic acid responsiveness
SiCLE12	Si3g14760	1667	1707	cis-acting element involved in the abscisic acid responsiveness
SiCLE12	Si3g14760	1669	1709	cis-acting element involved in the abscisic acid responsiveness
SiCLE12	Si3g14760	1760	1800	cis-acting element involved in the abscisic acid responsiveness
SiCLE12	Si3g14760	1917	1957	cis-acting element involved in the abscisic acid responsiveness
SiCLE12	Si3g14760	1920	1960	cis-acting element involved in the abscisic acid responsiveness
SiCLE12	Si3g14760	1042	1082	cis-acting element involved in gibberellin-responsiveness
SiCLE12	Si3g14760	1180	1220	cis-acting element involved in gibberellin-responsiveness
SiCLE12	Si3g14760	613	653	cis-acting element involved in auxin responsiveness
SiCLE12	Si3g14760	707	747	cis-acting element involved in auxin responsiveness
SiCLE12	Si3g14760	760	800	cis-acting element involved in low-temperature responsiveness
SiCLE12	Si3g14760	1117	1157	cis-acting element involved in low-temperature responsiveness
SiCLE12	Si3g14760	483	523	cis-acting element involved in auxin responsiveness
SiCLE13	Si3g17810	277	317	cis-acting regulatory element involved in the MeJA-responsiveness
SiCLE13	Si3g17810	900	940	cis-acting regulatory element involved in the MeJA-responsiveness
SiCLE13	Si3g17810	15	55	cis-acting element involved in the abscisic acid responsiveness
SiCLE13	Si3g17810	16	56	cis-acting element involved in the abscisic acid responsiveness
SiCLE13	Si3g17810	1020	1060	cis-acting element involved in the abscisic acid responsiveness
SiCLE13	Si3g17810	995	1035	cis-acting regulatory element related to meristem expression
SiCLE13	Si3g17810	1726	1766	cis-acting regulatory element related to meristem expression
SiCLE13	Si3g17810	339	379	cis-acting element involved in auxin responsiveness
SiCLE14	Si3g17830	1709	1749	cis-acting element involved in the abscisic acid responsiveness
SiCLE14	Si3g17830	28	68	cis-acting regulatory element involved in the MeJA-responsiveness
SiCLE14	Si3g17830	406	446	cis-acting regulatory element involved in the MeJA-responsiveness
SiCLE14	Si3g17830	1609	1649	cis-acting regulatory element involved in the MeJA-responsiveness
SiCLE14	Si3g17830	1839	1879	cis-acting element involved in auxin responsiveness
SiCLE14	Si3g17830	364	404	cis-acting element involved in salicylic acid responsiveness
SiCLE14	Si3g17830	924	964	cis-acting element involved in salicylic acid responsiveness
SiCLE15	Si3g18030	1712	1752	cis-acting regulatory element involved in the MeJA-responsiveness
SiCLE15	Si3g18030	826	866	cis-acting element involved in the abscisic acid responsiveness
SiCLE15	Si3g18030	1842	1882	cis-acting element involved in the abscisic acid responsiveness
SiCLE15	Si3g18030	614	654	cis-acting element involved in gibberellin-responsiveness
SiCLE15	Si3g18030	1620	1660	cis-acting element involved in gibberellin-responsiveness
SiCLE15	Si3g18030	587	627	cis-acting element involved in low-temperature responsiveness
SiCLE15	Si3g18030	1701	1741	cis-acting element involved in low-temperature responsiveness
SiCLE16	Si3g18460	453	493	cis-acting element involved in auxin responsiveness
SiCLE16	Si3g18460	209	249	cis-acting element involved in gibberellin-responsiveness
SiCLE16	Si3g18460	903	943	cis-acting element involved in gibberellin-responsiveness
SiCLE16	Si3g18460	290	330	cis-acting element involved in the abscisic acid responsiveness
SiCLE16	Si3g18460	324	364	cis-acting element involved in the abscisic acid responsiveness
SiCLE16	Si3g18460	396	436	cis-acting element involved in the abscisic acid responsiveness
SiCLE16	Si3g18460	398	438	cis-acting element involved in the abscisic acid responsiveness
SiCLE16	Si3g18460	399	439	cis-acting element involved in the abscisic acid responsiveness
SiCLE16	Si3g18460	828	868	cis-acting element involved in the abscisic acid responsiveness
SiCLE16	Si3g18460	830	870	cis-acting element involved in the abscisic acid responsiveness
SiCLE16	Si3g18460	831	871	cis-acting element involved in the abscisic acid responsiveness
SiCLE16	Si3g18460	843	883	cis-acting element involved in the abscisic acid responsiveness
SiCLE16	Si3g18460	844	884	cis-acting element involved in the abscisic acid responsiveness
SiCLE16	Si3g18460	1339	1379	cis-acting element involved in the abscisic acid responsiveness
SiCLE16	Si3g18460	377	417	cis-acting regulatory element involved in the MeJA-responsiveness
SiCLE16	Si3g18460	499	539	cis-acting regulatory element involved in the MeJA-responsiveness
SiCLE16	Si3g18460	1036	1076	cis-acting regulatory element involved in the MeJA-responsiveness
SiCLE16	Si3g18460	1751	1791	cis-acting regulatory element involved in the MeJA-responsiveness
SiCLE16	Si3g18460	999	1039	cis-acting element involved in salicylic acid responsiveness
SiCLE16	Si3g18460	109	149	cis-acting regulatory element related to meristem expression
SiCLE16	Si3g18460	1048	1088	cis-acting regulatory element related to meristem expression
SiCLE16	Si3g18460	1620	1660	cis-acting regulatory element related to meristem expression
SiCLE17	Si3g22990	1731	1771	cis-acting element involved in defense and stress responsiveness
SiCLE17	Si3g22990	166	206	cis-acting element involved in auxin responsiveness
SiCLE17	Si3g22990	1878	1918	cis-acting element involved in auxin responsiveness
SiCLE17	Si3g22990	1469	1509	cis-acting element involved in the abscisic acid responsiveness
SiCLE17	Si3g22990	1572	1612	cis-acting element involved in the abscisic acid responsiveness
SiCLE17	Si3g22990	1673	1713	cis-acting element involved in the abscisic acid responsiveness
SiCLE17	Si3g22990	1815	1855	cis-acting element involved in the abscisic acid responsiveness
SiCLE17	Si3g22990	1818	1858	cis-acting element involved in the abscisic acid responsiveness
SiCLE17	Si3g22990	1709	1749	cis-acting element involved in gibberellin-responsiveness
SiCLE17	Si3g22990	1721	1761	cis-acting element involved in gibberellin-responsiveness
SiCLE17	Si3g22990	629	669	cis-acting regulatory element involved in the MeJA-responsiveness
SiCLE17	Si3g22990	1974	2014	cis-acting regulatory element involved in the MeJA-responsiveness
SiCLE17	Si3g22990	189	229	cis-acting element involved in auxin responsiveness
SiCLE17	Si3g22990	526	566	cis-acting regulatory element related to meristem expression
SiCLE17	Si3g22990	1415	1455	cis-acting element involved in low-temperature responsiveness
SiCLE18	Si4g07460	1269	1309	cis-acting element involved in salicylic acid responsiveness
SiCLE18	Si4g07460	484	524	cis-acting regulatory element related to meristem expression
SiCLE18	Si4g07460	1146	1186	cis-acting regulatory element related to meristem expression
SiCLE18	Si4g07460	1930	1970	cis-acting regulatory element related to meristem expression
SiCLE18	Si4g07460	312	352	cis-acting regulatory element involved in the MeJA-responsiveness
SiCLE18	Si4g07460	1474	1514	cis-acting regulatory element involved in the MeJA-responsiveness
SiCLE18	Si4g07460	1477	1517	cis-acting regulatory element involved in the MeJA-responsiveness
SiCLE18	Si4g07460	1492	1532	cis-acting regulatory element involved in the MeJA-responsiveness
SiCLE18	Si4g07460	1823	1863	cis-acting element involved in auxin responsiveness
SiCLE18	Si4g07460	1837	1877	cis-acting element involved in auxin responsiveness
SiCLE18	Si4g07460	787	827	cis-acting element involved in gibberellin-responsiveness
SiCLE18	Si4g07460	269	309	cis-acting element involved in low-temperature responsiveness
SiCLE18	Si4g07460	290	330	cis-acting element involved in the abscisic acid responsiveness
SiCLE18	Si4g07460	421	461	cis-acting element involved in the abscisic acid responsiveness
SiCLE18	Si4g07460	423	463	cis-acting element involved in the abscisic acid responsiveness
SiCLE18	Si4g07460	1026	1066	cis-acting element involved in the abscisic acid responsiveness
SiCLE18	Si4g07460	1298	1338	cis-acting element involved in the abscisic acid responsiveness
SiCLE19	Si4g16140	1104	1144	cis-acting regulatory element involved in the MeJA-responsiveness
SiCLE19	Si4g16140	337	377	cis-acting regulatory element related to meristem expression
SiCLE19	Si4g16140	1659	1699	cis-acting regulatory element related to meristem expression
SiCLE19	Si4g16140	-2	38	cis-acting element involved in auxin responsiveness
SiCLE19	Si4g16140	1347	1387	cis-acting element involved in auxin responsiveness
SiCLE19	Si4g16140	1672	1712	cis-acting element involved in auxin responsiveness
SiCLE19	Si4g16140	967	1007	cis-acting element involved in gibberellin-responsiveness
SiCLE19	Si4g16140	1126	1166	cis-acting element involved in the abscisic acid responsiveness
SiCLE19	Si4g16140	1147	1187	cis-acting element involved in the abscisic acid responsiveness
SiCLE20	Si4g16170	9	49	cis-acting element involved in defense and stress responsiveness
SiCLE20	Si4g16170	52	92	cis-acting element involved in the abscisic acid responsiveness
SiCLE20	Si4g16170	62	102	cis-acting element involved in the abscisic acid responsiveness
SiCLE20	Si4g16170	367	407	cis-acting element involved in the abscisic acid responsiveness
SiCLE20	Si4g16170	1225	1265	cis-acting element involved in the abscisic acid responsiveness
SiCLE20	Si4g16170	1226	1266	cis-acting element involved in the abscisic acid responsiveness
SiCLE20	Si4g16170	1925	1965	cis-acting element involved in the abscisic acid responsiveness
SiCLE20	Si4g16170	1927	1967	cis-acting element involved in the abscisic acid responsiveness
SiCLE20	Si4g16170	807	847	cis-acting regulatory element related to meristem expression
SiCLE20	Si4g16170	710	750	cis-acting element involved in low-temperature responsiveness
SiCLE21	Si4g23620	358	398	cis-acting regulatory element involved in the MeJA-responsiveness
SiCLE21	Si4g23620	1902	1942	cis-acting regulatory element involved in the MeJA-responsiveness
SiCLE21	Si4g23620	174	214	cis-acting element involved in salicylic acid responsiveness
SiCLE21	Si4g23620	356	396	cis-acting element involved in the abscisic acid responsiveness
SiCLE21	Si4g23620	361	401	cis-acting element involved in the abscisic acid responsiveness
SiCLE21	Si4g23620	410	450	cis-acting element involved in the abscisic acid responsiveness
SiCLE21	Si4g23620	728	768	cis-acting element involved in the abscisic acid responsiveness
SiCLE21	Si4g23620	730	770	cis-acting element involved in the abscisic acid responsiveness
SiCLE21	Si4g23620	1900	1940	cis-acting element involved in the abscisic acid responsiveness
SiCLE22	Si5g09450	125	165	cis-acting element involved in the abscisic acid responsiveness
SiCLE22	Si5g09450	739	779	cis-acting element involved in the abscisic acid responsiveness
SiCLE22	Si5g09450	928	968	cis-acting element involved in the abscisic acid responsiveness
SiCLE22	Si5g09450	1213	1253	cis-acting element involved in the abscisic acid responsiveness
SiCLE22	Si5g09450	1216	1256	cis-acting element involved in the abscisic acid responsiveness
SiCLE22	Si5g09450	1218	1258	cis-acting element involved in the abscisic acid responsiveness
SiCLE22	Si5g09450	84	124	cis-acting regulatory element involved in the MeJA-responsiveness
SiCLE22	Si5g09450	741	781	cis-acting regulatory element involved in the MeJA-responsiveness
SiCLE22	Si5g09450	1189	1229	cis-acting regulatory element involved in the MeJA-responsiveness
SiCLE22	Si5g09450	1790	1830	cis-acting element involved in salicylic acid responsiveness
SiCLE22	Si5g09450	1777	1817	cis-acting element involved in low-temperature responsiveness
SiCLE23	Si5g12400	1724	1764	cis-acting element involved in the abscisic acid responsiveness
SiCLE23	Si5g12400	1810	1850	cis-acting element involved in the abscisic acid responsiveness
SiCLE23	Si5g12400	1220	1260	cis-acting element involved in gibberellin-responsiveness
SiCLE23	Si5g12400	387	427	cis-acting regulatory element involved in the MeJA-responsiveness
SiCLE23	Si5g12400	704	744	cis-acting regulatory element involved in the MeJA-responsiveness
SiCLE23	Si5g12400	892	932	cis-acting regulatory element involved in the MeJA-responsiveness
SiCLE23	Si5g12400	1324	1364	cis-acting regulatory element involved in the MeJA-responsiveness
SiCLE23	Si5g12400	1443	1483	cis-acting regulatory element involved in the MeJA-responsiveness
SiCLE23	Si5g12400	1726	1766	cis-acting regulatory element involved in the MeJA-responsiveness
SiCLE23	Si5g12400	1676	1716	cis-acting element involved in auxin responsiveness
SiCLE23	Si5g12400	1774	1814	cis-acting element involved in auxin responsiveness
SiCLE24	Si5g16690	1567	1607	cis-acting regulatory element related to meristem expression
SiCLE24	Si5g16690	172	212	cis-acting regulatory element involved in the MeJA-responsiveness
SiCLE24	Si5g16690	230	270	cis-acting regulatory element involved in the MeJA-responsiveness
SiCLE24	Si5g16690	1485	1525	cis-acting regulatory element involved in the MeJA-responsiveness
SiCLE24	Si5g16690	1694	1734	cis-acting element involved in low-temperature responsiveness
SiCLE24	Si5g16690	646	686	cis-acting element involved in the abscisic acid responsiveness
SiCLE24	Si5g16690	1327	1367	cis-acting element involved in the abscisic acid responsiveness
SiCLE24	Si5g16690	1328	1368	cis-acting element involved in the abscisic acid responsiveness
SiCLE24	Si5g16690	1379	1419	cis-acting element involved in the abscisic acid responsiveness
SiCLE24	Si5g16690	1381	1421	cis-acting element involved in the abscisic acid responsiveness
SiCLE25	Si5g18600	444	484	cis-acting element involved in low-temperature responsiveness
SiCLE25	Si5g18600	48	88	cis-acting regulatory element involved in the MeJA-responsiveness
SiCLE25	Si5g18600	1	41	cis-acting regulatory element related to meristem expression
SiCLE25	Si5g18600	257	297	cis-acting element involved in the abscisic acid responsiveness
SiCLE25	Si5g18600	1161	1201	cis-acting element involved in the abscisic acid responsiveness
SiCLE25	Si5g18600	1264	1304	cis-acting element involved in the abscisic acid responsiveness
SiCLE25	Si5g18600	1813	1853	cis-acting element involved in the abscisic acid responsiveness
SiCLE25	Si5g18600	1929	1969	cis-acting element involved in auxin responsiveness
SiCLE26	Si5g32640	129	169	cis-acting element involved in auxin responsiveness
SiCLE26	Si5g32640	913	953	cis-acting element involved in gibberellin-responsiveness
SiCLE26	Si5g32640	256	296	cis-acting regulatory element involved in the MeJA-responsiveness
SiCLE26	Si5g32640	1207	1247	cis-acting regulatory element involved in the MeJA-responsiveness
SiCLE26	Si5g32640	1935	1975	cis-acting regulatory element involved in the MeJA-responsiveness
SiCLE26	Si5g32640	677	717	cis-acting element involved in auxin responsiveness
SiCLE26	Si5g32640	1317	1357	cis-acting element involved in salicylic acid responsiveness
SiCLE26	Si5g32640	649	689	cis-acting regulatory element related to meristem expression
SiCLE26	Si5g32640	1567	1607	cis-acting regulatory element related to meristem expression
SiCLE26	Si5g32640	446	486	cis-acting element involved in defense and stress responsiveness
SiCLE26	Si5g32640	904	944	cis-acting element involved in defense and stress responsiveness
SiCLE26	Si5g32640	106	146	cis-acting element involved in gibberellin-responsiveness
SiCLE26	Si5g32640	40	80	cis-acting element involved in the abscisic acid responsiveness
SiCLE26	Si5g32640	1364	1404	cis-acting element involved in the abscisic acid responsiveness
SiCLE26	Si5g32640	1878	1918	cis-acting element involved in the abscisic acid responsiveness
SiCLE26	Si5g32640	1226	1266	cis-acting element involved in low-temperature responsiveness
SiCLE27	Si5g32660	1570	1610	cis-acting regulatory element related to meristem expression
SiCLE27	Si5g32660	128	168	cis-acting regulatory element involved in the MeJA-responsiveness
SiCLE27	Si5g32660	432	472	cis-acting regulatory element involved in the MeJA-responsiveness
SiCLE27	Si5g32660	692	732	cis-acting regulatory element involved in the MeJA-responsiveness
SiCLE27	Si5g32660	1110	1150	cis-acting regulatory element involved in the MeJA-responsiveness
SiCLE27	Si5g32660	1333	1373	cis-acting regulatory element involved in the MeJA-responsiveness
SiCLE27	Si5g32660	1640	1680	cis-acting regulatory element involved in the MeJA-responsiveness
SiCLE27	Si5g32660	-19	21	cis-acting element involved in auxin responsiveness
SiCLE27	Si5g32660	356	396	cis-acting element involved in gibberellin-responsiveness
SiCLE27	Si5g32660	1608	1648	cis-acting element involved in low-temperature responsiveness
SiCLE27	Si5g32660	453	493	cis-acting element involved in the abscisic acid responsiveness
SiCLE27	Si5g32660	610	650	cis-acting element involved in the abscisic acid responsiveness
SiCLE27	Si5g32660	611	651	cis-acting element involved in the abscisic acid responsiveness
SiCLE27	Si5g32660	1278	1318	cis-acting element involved in the abscisic acid responsiveness
SiCLE27	Si5g32660	1280	1320	cis-acting element involved in the abscisic acid responsiveness
SiCLE27	Si5g32660	1752	1792	cis-acting element involved in the abscisic acid responsiveness
SiCLE28	Si5g32670	1257	1297	cis-acting regulatory element involved in the MeJA-responsiveness
SiCLE28	Si5g32670	1390	1430	cis-acting regulatory element involved in the MeJA-responsiveness
SiCLE28	Si5g32670	1635	1675	cis-acting regulatory element involved in the MeJA-responsiveness
SiCLE28	Si5g32670	1949	1989	cis-acting element involved in auxin responsiveness
SiCLE28	Si5g32670	974	1014	cis-acting regulatory element related to meristem expression
SiCLE28	Si5g32670	218	258	cis-acting element involved in gibberellin-responsiveness
SiCLE28	Si5g32670	1533	1573	cis-acting element involved in auxin responsiveness
SiCLE29	Si5g33310	381	421	cis-acting regulatory element involved in the MeJA-responsiveness
SiCLE29	Si5g33310	773	813	cis-acting regulatory element involved in the MeJA-responsiveness
SiCLE29	Si5g33310	1437	1477	cis-acting element involved in salicylic acid responsiveness
SiCLE29	Si5g33310	1243	1283	cis-acting element involved in low-temperature responsiveness
SiCLE29	Si5g33310	1593	1633	cis-acting element involved in defense and stress responsiveness
SiCLE29	Si5g33310	412	452	cis-acting element involved in gibberellin-responsiveness
SiCLE29	Si5g33310	621	661	cis-acting element involved in gibberellin-responsiveness
SiCLE29	Si5g33310	1320	1360	cis-acting element involved in gibberellin-responsiveness
SiCLE29	Si5g33310	481	521	cis-acting element involved in the abscisic acid responsiveness
SiCLE29	Si5g33310	738	778	cis-acting element involved in the abscisic acid responsiveness
SiCLE30	Si6g16350	1830	1870	cis-acting element involved in defense and stress responsiveness
SiCLE30	Si6g16350	588	628	cis-acting regulatory element involved in the MeJA-responsiveness
SiCLE30	Si6g16350	734	774	cis-acting regulatory element involved in the MeJA-responsiveness
SiCLE30	Si6g16350	849	889	cis-acting regulatory element involved in the MeJA-responsiveness
SiCLE30	Si6g16350	1293	1333	cis-acting element involved in the abscisic acid responsiveness
SiCLE30	Si6g16350	1910	1950	cis-acting regulatory element related to meristem expression
SiCLE30	Si6g16350	724	764	cis-acting element involved in salicylic acid responsiveness
SiCLE30	Si6g16350	841	881	cis-acting element involved in auxin responsiveness
SiCLE31	Si7g13900	76	116	cis-acting regulatory element involved in the MeJA-responsiveness
SiCLE31	Si7g13900	164	204	cis-acting regulatory element involved in the MeJA-responsiveness
SiCLE31	Si7g13900	514	554	cis-acting regulatory element involved in the MeJA-responsiveness
SiCLE31	Si7g13900	721	761	cis-acting regulatory element related to meristem expression
SiCLE31	Si7g13900	289	329	cis-acting element involved in salicylic acid responsiveness
SiCLE31	Si7g13900	969	1009	cis-acting element involved in low-temperature responsiveness
SiCLE31	Si7g13900	123	163	cis-acting element involved in the abscisic acid responsiveness
SiCLE31	Si7g13900	913	953	cis-acting element involved in the abscisic acid responsiveness
SiCLE31	Si7g13900	1568	1608	cis-acting element involved in the abscisic acid responsiveness
SiCLE32	Si7g19100	965	1005	cis-acting element involved in the abscisic acid responsiveness
SiCLE32	Si7g19100	1005	1045	cis-acting element involved in the abscisic acid responsiveness
SiCLE32	Si7g19100	1297	1337	cis-acting element involved in the abscisic acid responsiveness
SiCLE32	Si7g19100	1549	1589	cis-acting element involved in the abscisic acid responsiveness
SiCLE32	Si7g19100	1636	1676	cis-acting element involved in the abscisic acid responsiveness
SiCLE32	Si7g19100	1295	1335	cis-acting regulatory element involved in the MeJA-responsiveness
SiCLE32	Si7g19100	1384	1424	cis-acting regulatory element involved in the MeJA-responsiveness
SiCLE32	Si7g19100	1810	1850	cis-acting element involved in salicylic acid responsiveness
SiCLE32	Si7g19100	468	508	cis-acting regulatory element related to meristem expression
SiCLE32	Si7g19100	1344	1384	cis-acting regulatory element related to meristem expression
SiCLE33	Si8g17400	1088	1128	cis-acting regulatory element involved in the MeJA-responsiveness
SiCLE33	Si8g17400	1289	1329	cis-acting regulatory element involved in the MeJA-responsiveness
SiCLE33	Si8g17400	888	928	cis-acting element involved in auxin responsiveness
SiCLE33	Si8g17400	1086	1126	cis-acting element involved in the abscisic acid responsiveness
SiCLE33	Si8g17400	1827	1867	cis-acting element involved in gibberellin-responsiveness
SiCLE33	Si8g17400	1959	1999	cis-acting element involved in auxin responsiveness
SiCLE34	Si9g05550	-17	23	cis-acting element involved in the abscisic acid responsiveness
SiCLE34	Si9g05550	1806	1846	cis-acting element involved in the abscisic acid responsiveness
SiCLE34	Si9g05550	1808	1848	cis-acting element involved in the abscisic acid responsiveness
SiCLE34	Si9g05550	1262	1302	cis-acting element involved in gibberellin-responsiveness
SiCLE34	Si9g05550	-14	26	cis-acting regulatory element involved in the MeJA-responsiveness
SiCLE34	Si9g05550	413	453	cis-acting regulatory element involved in the MeJA-responsiveness
SiCLE34	Si9g05550	1596	1636	cis-acting element involved in defense and stress responsiveness
SiCLE34	Si9g05550	1487	1527	cis-acting regulatory element related to meristem expression
SiCLE35	Si9g13150	1020	1060	cis-acting regulatory element related to meristem expression
SiCLE35	Si9g13150	182	222	cis-acting regulatory element involved in the MeJA-responsiveness
SiCLE35	Si9g13150	330	370	cis-acting regulatory element involved in the MeJA-responsiveness
SiCLE35	Si9g13150	897	937	cis-acting regulatory element involved in the MeJA-responsiveness
SiCLE35	Si9g13150	1170	1210	cis-acting regulatory element involved in the MeJA-responsiveness
SiCLE35	Si9g13150	1665	1705	cis-acting regulatory element involved in the MeJA-responsiveness
SiCLE35	Si9g13150	1244	1284	cis-acting element involved in the abscisic acid responsiveness
SiCLE35	Si9g13150	353	393	cis-acting element involved in auxin responsiveness
SiCLE35	Si9g13150	1071	1111	cis-acting element involved in auxin responsiveness
SiCLE36	Si9g19660	317	357	cis-acting regulatory element involved in the MeJA-responsiveness
SiCLE36	Si9g19660	713	753	cis-acting regulatory element involved in the MeJA-responsiveness
SiCLE36	Si9g19660	1255	1295	cis-acting regulatory element involved in the MeJA-responsiveness
SiCLE36	Si9g19660	286	326	cis-acting element involved in the abscisic acid responsiveness
SiCLE36	Si9g19660	288	328	cis-acting element involved in the abscisic acid responsiveness
SiCLE36	Si9g19660	289	329	cis-acting element involved in the abscisic acid responsiveness
SiCLE36	Si9g19660	315	355	cis-acting element involved in the abscisic acid responsiveness
SiCLE36	Si9g19660	696	736	cis-acting element involved in low-temperature responsiveness
SiCLE37	Si9g19670	8	48	cis-acting regulatory element involved in the MeJA-responsiveness
SiCLE37	Si9g19670	253	293	cis-acting regulatory element involved in the MeJA-responsiveness
SiCLE37	Si9g19670	280	320	cis-acting regulatory element involved in the MeJA-responsiveness
SiCLE37	Si9g19670	799	839	cis-acting regulatory element involved in the MeJA-responsiveness
SiCLE37	Si9g19670	971	1011	cis-acting regulatory element involved in the MeJA-responsiveness
SiCLE37	Si9g19670	1063	1103	cis-acting regulatory element involved in the MeJA-responsiveness
SiCLE37	Si9g19670	1793	1833	cis-acting regulatory element involved in the MeJA-responsiveness
SiCLE37	Si9g19670	738	778	cis-acting element involved in the abscisic acid responsiveness
SiCLE37	Si9g19670	1185	1225	cis-acting element involved in the abscisic acid responsiveness
SiCLE37	Si9g19670	1187	1227	cis-acting element involved in the abscisic acid responsiveness
SiCLE37	Si9g19670	1188	1228	cis-acting element involved in the abscisic acid responsiveness
SiCLE37	Si9g19670	1317	1357	cis-acting element involved in the abscisic acid responsiveness
SiCLE37	Si9g19670	1318	1358	cis-acting element involved in the abscisic acid responsiveness
SiCLE37	Si9g19670	1349	1389	cis-acting element involved in the abscisic acid responsiveness
SiCLE37	Si9g19670	1791	1831	cis-acting element involved in the abscisic acid responsiveness
SiCLE37	Si9g19670	14	54	cis-acting element involved in gibberellin-responsiveness
SiCLE37	Si9g19670	1703	1743	cis-acting element involved in gibberellin-responsiveness
SiCLE37	Si9g19670	1044	1084	cis-acting element involved in auxin responsiveness
SiCLE37	Si9g19670	1944	1984	cis-acting element involved in defense and stress responsiveness
SiCLE37	Si9g19670	1466	1506	cis-acting element involved in low-temperature responsiveness
SiCLE37	Si9g19670	155	195	cis-acting element involved in gibberellin-responsiveness
SiCLE37	Si9g19670	896	936	cis-acting element involved in salicylic acid responsiveness
SiCLE38	Si9g38030	33	73	cis-acting element involved in gibberellin-responsiveness
SiCLE38	Si9g38030	877	917	cis-acting element involved in gibberellin-responsiveness
SiCLE38	Si9g38030	51	91	cis-acting element involved in gibberellin-responsiveness
SiCLE38	Si9g38030	855	895	cis-acting element involved in low-temperature responsiveness
SiCLE39	Si9g38660	980	1020	cis-acting regulatory element related to meristem expression
SiCLE39	Si9g38660	1057	1097	cis-acting regulatory element related to meristem expression
SiCLE39	Si9g38660	1535	1575	cis-acting regulatory element related to meristem expression
SiCLE39	Si9g38660	1403	1443	cis-acting regulatory element involved in the MeJA-responsiveness
SiCLE39	Si9g38660	1626	1666	cis-acting regulatory element involved in the MeJA-responsiveness
SiCLE39	Si9g38660	346	386	cis-acting element involved in low-temperature responsiveness
SiCLE39	Si9g38660	524	564	cis-acting element involved in the abscisic acid responsiveness
SiCLE39	Si9g38660	661	701	cis-acting element involved in the abscisic acid responsiveness
SiCLE39	Si9g38660	1152	1192	cis-acting element involved in the abscisic acid responsiveness
SiCLE40	Si9g44430	361	401	cis-acting element involved in gibberellin-responsiveness
SiCLE40	Si9g44430	78	118	cis-acting element involved in the abscisic acid responsiveness
SiCLE40	Si9g44430	216	256	cis-acting element involved in the abscisic acid responsiveness
SiCLE40	Si9g44430	727	767	cis-acting element involved in the abscisic acid responsiveness
SiCLE40	Si9g44430	76	116	cis-acting regulatory element involved in the MeJA-responsiveness
SiCLE40	Si9g44430	862	902	cis-acting regulatory element involved in the MeJA-responsiveness
SiCLE40	Si9g44430	1172	1212	cis-acting regulatory element involved in the MeJA-responsiveness
SiCLE40	Si9g44430	1565	1605	cis-acting regulatory element involved in the MeJA-responsiveness
SiCLE40	Si9g44430	1582	1622	cis-acting regulatory element involved in the MeJA-responsiveness
SiCLE40	Si9g44430	1771	1811	cis-acting regulatory element involved in the MeJA-responsiveness
SiCLE40	Si9g44430	1318	1358	cis-acting element involved in auxin responsiveness
SiCLE40	Si9g44430	1667	1707	cis-acting regulatory element related to meristem expression
SiCLE41	Si9g55410	1069	1109	cis-acting regulatory element involved in the MeJA-responsiveness
SiCLE41	Si9g55410	1140	1180	cis-acting regulatory element involved in the MeJA-responsiveness
SiCLE41	Si9g55410	1479	1519	cis-acting regulatory element involved in the MeJA-responsiveness
SiCLE41	Si9g55410	645	685	cis-acting element involved in the abscisic acid responsiveness
SiCLE41	Si9g55410	1071	1111	cis-acting element involved in the abscisic acid responsiveness
SiCLE41	Si9g55410	1142	1182	cis-acting element involved in the abscisic acid responsiveness
SiCLE41	Si9g55410	1168	1208	cis-acting element involved in the abscisic acid responsiveness
SiCLE41	Si9g55410	1744	1784	cis-acting element involved in the abscisic acid responsiveness
SiCLE41	Si9g55410	1779	1819	cis-acting element involved in auxin responsiveness
SiCLE41	Si9g55410	194	234	cis-acting element involved in defense and stress responsiveness
SiCLE41	Si9g55410	737	777	cis-acting regulatory element related to meristem expression
SiCLE41	Si9g55410	216	256	cis-acting element involved in gibberellin-responsiveness
