# Supplementary material for: Genome-Wide Identification and Characterization of CLAVATA3/EMBRYO SURROUNDING REGION (CLE) Gene Family in Foxtail Millet (Setaria italica L.)
Source: Genes (Basel). 2023 Nov 6;14(11):2046. doi: 10.3390/genes14112046 (PMC10671770; doi:10.3390/genes14112046)
Supplement: Supplementary file 1 [file genes-14-02046-s001.zip › Table S4. The Transcripts Per Million (TPM) values of the SiCLE genes in different tissues..xlsx]

## Sheet: Sheet1
Table S4. The Transcripts Per Million (TPM) values of the SiCLE genes in different tissues.
Gene ID	JG21_Germinated-seeds_3-days	JG21_Plant_one-tip-two-leaf	JG21_Leaf-top-2-3_2-days-after-heading (leaf 2)	JG21_Neck-panicle-internodes_Filling-stage	JG21_Flag-leaf_filling-stage	JG21_Flag-leaf-sheath_filling-stage	JG21_Stem-top-second_Filling-stage	JG21_Leaf-top-foruth_filling-stage (leaf 1)	JG21_Leaf-sheath-top-foruth_filling-stage ( leaf sheath 1)	JG21_Root_Filling-stage	JG21_Panicle_Primary-panicle-branch-differentiation-stage (panicle 1)	JG21_Panicle_Third-panicle-branch-differentiation-stage (panicle 2)	JG21_Immature-spikelet_S2	JG21_Immature-spikelet_S4	JG21_Immature-seed_S1	JG21_Immature-seed_S2	JG21_Immature-seed_S3	JG21_Immature-seed_S4	JG21_Immature-seed_S5
Si1g02740	0.143627018	0.098926377	0	0	0	0.073385105	0.197883687	0	0	0.092153593	0.215490046	0.04727392	0.078628331	0	0	0	0	0	0
Si1g09260	0.026060621	0	0	0	0.052814553	0	0	0	0.421864698	0.017196319	2.786123421	0.789803324	0.043975632	0.042927452	0.065179357	0	0.026029422	0.119965937	0
Si1g15040	0.627190471	1.36826377	2.252361071	1.431325381	2.62352065	1.082369141	1.346381439	1.554922359	1.571528212	3.872304717	0.155469233	0.405809337	3.703280295	4.814261289	4.979903117	19.19738199	3.082938865	3.94803413	1.452396342
Si1g21450	0.523561516	0.547348514	0	0	0	0	0	0	0	0.025610601	3.593325589	3.321445583	0.143972412	0.119668916	0.203230279	1.2043416	0.558082833	0.574468842	0.093313196
Si1g25600	0.602016101	0.966836497	1.211653165	0.120399855	1.212982697	0.498628375	0.100434428	0.435111554	0.369822975	0	0.054330884	0.051016656	0.244313847	0.381451246	0.142532933	0.418100389	0.429184714	0.912171724	0.35334821
Si1g36220	6.723833306	7.394241105	0	0.407963419	0.750312123	0.487769616	0.696383278	1.823525687	0.211700474	0.319990829	55.2899442	42.15791576	1.338476012	0.841976669	1.476983851	3.231441747	1.632488564	0.972250275	0.183321251
Si1g37440	1.857095409	1.191451719	0.069867116	0.170849912	0.176265274	0.062682735	0.176794793	0.121571193	0.199043635	1.219136411	0.15696996	0.141047686	0.572659129	0.232891891	0.481279153	3.777992026	0.553493402	0.328869463	0.24090465
Si2g07840	1.964800788	3.63842691	2.006815636	1.329320673	0.300219999	0.91209992	4.217192656	0.220796667	2.655455409	2.943326501	9.681461067	8.312307442	0.258992042	0.135325154	0.203214961	0.216833272	0.099305882	0	0
Si2g37520	1.574976957	0.211361359	0.059320976	0.161810746	0	0	0	0.096905428	0	2.088217907	2.872163093	3.240339599	0.155652406	0	0.084407312	5.290126327	0.316224027	0	0
Si3g03240	2.130220924	9.861239193	2.283037509	0.497082787	3.715760066	1.310405765	2.58622502	3.417474916	3.083242588	0.535359721	4.961969338	4.784034063	0.207703017	0.106224113	0.238568534	1.377354499	0.156928636	0	0.010860392
Si3g10460	0.79969609	2.581303456	0	0	0	0	0.075688054	0	0	0	8.45775749	13.41344101	0.060262322	0.108882308	0	0	0.059210138	0	0
Si3g14760	3.184081343	3.700992847	0	1.425114437	0	0.439285061	7.13359907	0	0.590348283	14.86682316	18.90331308	18.40134321	0.450954881	0.494492623	0.38008977	0	0	0.194696339	0.393169115
Si3g17810	0	0.087838441	0	0	0	0	0	0	0	0	0	0	0	0	0	0	0	0	0
Si3g17830	0	0.471964612	0	4.93293735	0	0.184155933	0.155235862	0	0	8.347947357	0	0	0	0.050928822	0	0	0.347855521	1.800366379	7.130794946
Si3g18030	6.395253701	5.286409709	3.660464146	3.005522607	2.389503938	3.163849095	3.360547575	3.361582925	4.924928132	0.077193533	0.322240206	1.805638305	2.323633752	0.927030262	3.024830672	4.28087356	3.688563845	2.066723563	0.271906074
Si3g18460	0.674895972	1.522161355	0	0	0	0	0	0	0	0	13.7320825	13.64170667	0.325987642	0.248760434	0.482979948	0.20983865	0.463832221	0.110330851	0.075238371
Si3g22990	1.556707065	2.919578974	1.144551221	0.546685561	0.939410309	0.151274936	1.583988011	0.638634487	0.848884998	1.342891938	0	0.100571303	3.067060612	5.485544949	4.41009504	36.85496626	4.693736437	8.741113306	5.138066982
Si4g07460	0.07250325	0.121143033	0	0	0	0	0	0	0	0.332961669	0	0	0	0.039376252	0.213157736	0	0.063946949	0.586096592	0.022311863
Si4g16140	0	0.117823934	0	0	0	0	0	0	0	18.0081452	0.054612402	0.147082109	0	0	0	0	0	0	0
Si4g16170	0	0.126562286	0	0	0	0	0	0	0	0.362387647	0	0	0	0	0	0	0	0	0
Si4g23620	0.282094288	0.393108163	0.158263924	0	0.154957013	0.072863122	0.074949634	0.295363621	0.045513626	0	1.723155254	1.804217213	0.815082432	0.378503253	0.87098052	7.578791515	0.496317914	0.395088788	0.212570474
Si5g09450	5.73315689	5.839965461	0	0.06864958	0.033839297	0.092343479	1.044297547	0.016766682	0	1.254447683	0.480566603	0.236659856	0.691925114	0.799032994	0.601462947	1.038010558	0.979472534	1.29916028	0.639418443
Si5g12400	5.200266121	10.953151	0.572132261	31.62228505	1.544001066	1.350642185	22.5958445	0.644412227	1.395091967	0.524808637	11.31923868	12.72448523	0.113309019	0.276766104	0.121521605	1.949674886	1.106810219	0.233635606	0.98686896
Si5g16690	9.723448551	12.19090594	2.062177567	1.066502266	2.204053489	3.540018496	2.349792183	2.570506986	2.662339266	3.961238485	143.7240862	77.81986842	0.569242624	0.526590945	0.745273025	0.210810126	0.945433976	0.040420062	0.423406546
Si5g18600	8.175934882	14.78182237	0	0	0	0	0	0	0	0.073029241	54.38646881	53.2889371	6.439850211	5.87944959	5.158390049	16.75393396	5.37278908	7.1034015	3.807722947
Si5g32640	0	0	0	0	0	0	0	0	0	0	0	0	0	0	0	0	0	0	0
Si5g32660	0.288421706	0.169170331	0	4.197460446	0	0	13.04882063	0.147388758	0	9.705812999	0.450682965	0.336858907	0	0.116947664	0.441896518	0	0	0.053893416	0
Si5g32670	0.61639871	0	0.117419274	0.082098059	0.126415132	0.092758756	0.146330237	0	0.31100978	5.241554419	0.714807881	1.024895886	0.18849447	0.316796304	0.166938906	0	0	0	0
Si5g33310	0.820348295	0.725115997	0	0	0	0	0	0	0	0	1.378179274	1.225056632	0	0.04085083	0.061511857	0.389187924	0.132084154	0	0
Si6g16350	0	0	0	0	0	0	0	0	0	0	0	0	0	0	0	0	0	0	0
Si7g13900	1.074067686	0.670216155	0.461982387	0	0.026935829	0	0	0	0	0	5.934214247	8.154971658	0.523454259	0.442979803	0.681221868	1.055993604	0.084316714	0.908077945	0.7391172
Si7g19100	7.272419832	22.61780848	7.415467378	14.30646812	25.53902142	17.10699921	20.2744539	25.60292345	24.36936024	6.529187084	4.377692481	5.109711257	9.129910468	9.027571666	10.82665684	43.20303773	13.67824501	8.316626245	5.353133756
Si8g17400	0	0.136092394	0.052272939	0	0	0	0.195589921	0.052236792	0	0	5.017688029	1.045890169	0.055143632	0	0	0	0	0	0
Si9g05550	3.955624945	9.379058108	0.264021347	0.216017346	0.821990375	0.171265017	0.161443985	0.470953896	1.081947398	2.945621121	68.4995702	73.33524327	3.471470303	2.129187101	3.64128907	9.146073111	1.940616145	2.668744894	0.492976728
Si9g13150	1.379276029	2.792326372	0	0	0	0	0	0	0	0	11.5922573	10.35538286	0.460452858	0.408847258	0.385053057	1.279122178	0.611576862	0.393657973	0.354191947
Si9g19660	7.646388158	0.798494078	0.514737588	1.422083827	0.688559596	10.05358178	0.079335671	0.727374475	2.241513631	2.835127459	0.216056519	0.374327032	0.345106377	1.031497398	0.956829527	3.193427398	0.207764967	0.368163457	2.527065623
Si9g19670	0.082909699	0	0	0.332646938	0.122751501	1.983386096	0	0	0	0	0	0	0.024460915	0.269232718	0.042683243	0	0	0	0
Si9g38030	3.28871186	9.709023449	0.847057896	12.87470685	11.93622374	7.819606768	9.025547309	12.53821779	6.988990302	8.172476391	17.86500425	20.97666538	2.065290537	2.346088051	3.106830032	2.72620473	1.777064221	2.235071945	0.853185433
Si9g38660	0.11968916	0.555961833	0.027472447	0	0.055362732	0.059363957	0	0.124143737	0.036209687	2.614040512	0.034406421	0.062748126	0.196129091	0	0	0.118375183	0	0	0
Si9g44430	2.216478964	0.4742814	0.207330669	0	0.128290347	0	0	0	0	1.553995958	0.074900142	0.440209118	0.628749906	0.856747314	2.795952148	9.278837968	1.026285559	0.157784339	0.12992852
Si9g55410	10.36813077	7.648045904	12.18972053	18.05539193	27.00398337	32.69078307	13.52840024	32.31773572	19.00365554	31.51271365	0.901690605	0.811969944	4.947691657	5.617864712	6.57003228	10.27202526	17.98627773	21.02903994	9.009321994
